# Supplementary material for: Two heterodinuclear NiFe-based sulfenate complexes mimicking an S-oxygenated intermediate of an O2-tolerant [NiFe]-H2ase: synthesis, structures, and reactivity
Source: Royal Society of Chemistry journal article supplement (doi:10.1039/d0nj02586k), 2020-01-01
Supplement: d0nj02586k1.pdf [file d0nj02586k1.pdf]

## Supporting Information

### for New Journal of Chemistry

#### Two heterodinuclear NiFe-based sulfenate complexes mimicking an S-oxygenated intermediate of an O<sub>2</sub>-tolerant [NiFe]-H<sub>2</sub>ase: synthesis, structures, and reactivity

Li-Cheng Song,<sup>\*ab</sup> Wei Chen,<sup>a</sup> and Li Feng<sup>a</sup>

<sup>a</sup>Department of Chemistry, State Key Laboratory of Elemento-Organic Chemistry, College of Chemistry, Nankai University, Tianjin 300071, China

<sup>b</sup>Collaborative Innovation Center of Chemical Science and Engineering (Tianjin), Tianjin 300072, China

#### Contents:

1. Selected bond lengths (Å) and angles (°) for complexes 2–5 and 7 (Table S1)
2. IR and <sup>1</sup>H (<sup>13</sup>C) NMR spectra of 1 (Fig. S1–S3)
3. IR and <sup>1</sup>H (<sup>13</sup>C) NMR spectra of 2 (Fig. S4–S6)
4. IR and <sup>1</sup>H (<sup>13</sup>C) NMR spectra of 3 (Fig. S7–S9)
5. IR and <sup>1</sup>H (<sup>13</sup>C) NMR spectra of 4 (Fig. S10–S12)
6. IR and <sup>1</sup>H (<sup>13</sup>C) NMR spectra of 5 (Fig. S13–S15)
7. IR and <sup>1</sup>H (<sup>13</sup>C) NMR spectra of 6 (Fig. S16–S18)
8. IR and <sup>1</sup>H (<sup>13</sup>C) NMR spectra of 7 (Fig. S19–S21)

## 1. Selected bond lengths (Å) and angles (°) for complexes 2–5 and 7

**Table S1** Selected bond lengths (Å) and angles (°) for complexes 2–5 and 7

|           | <b>2</b>   | <b>3</b>   | <b>4<sup>a</sup></b> | <b>5</b>   | <b>7</b>   |
|-----------|------------|------------|----------------------|------------|------------|
| Ni1–S1    | 2.1440(10) | 2.1147(9)  | 2.1513(13)           | 2.1533(5)  | 2.1520(15) |
| Ni1–S2    | 2.1358(12) | 2.1344(12) | 2.1512(13)           | 2.1742(5)  | 2.1536(16) |
| Ni1–N1    | 1.950(3)   | 1.953(2)   | 1.930(4)             | 1.9439(16) | 1.921(5)   |
| Ni1–N2    | 1.945(3)   | 1.936(2)   | 1.930(4)             | 1.9668(17) | 1.921(5)   |
| S1–Ni1–S2 | 93.43(4)   | 96.04(4)   | 92.53(7)             | 98.84(2)   | 90.27(6)   |
| N1–Ni1–S1 | 90.56(9)   | 87.89(7)   | 91.77(13)            | 89.15(5)   | 92.60(15)  |
| N1–Ni1–S2 | 175.97(9)  | 175.65(7)  | 173.29(13)           | 171.96(5)  | 174.34(15) |
| S1–Ni1–N2 | 174.04(9)  | 171.35(7)  | 173.29(13)           | 171.70(5)  | 173.41(15) |
| N2–Ni1–S2 | 92.36(10)  | 92.54(7)   | 91.77(13)            | 89.23(5)   | 92.66(16)  |
| N1–Ni1–N2 | 83.64(13)  | 83.58(10)  | 83.5(2)              | 82.81(7)   | 84.0(2)    |

<sup>a</sup> For complex **4** the corresponding bond lengths and angles are Ni1–S1, Ni1–S1a, Ni1–N1, Ni1–N1a, S1–Ni1–S1a, N1–Ni1–S1, N1–Ni1–S1a, S1–Ni1–N1a, N1a–Ni1–S1a, N1–Ni1–N1a, respectively.

## 2. IR and $^1\text{H}$ ( $^{13}\text{C}$ ) NMR spectra of 1

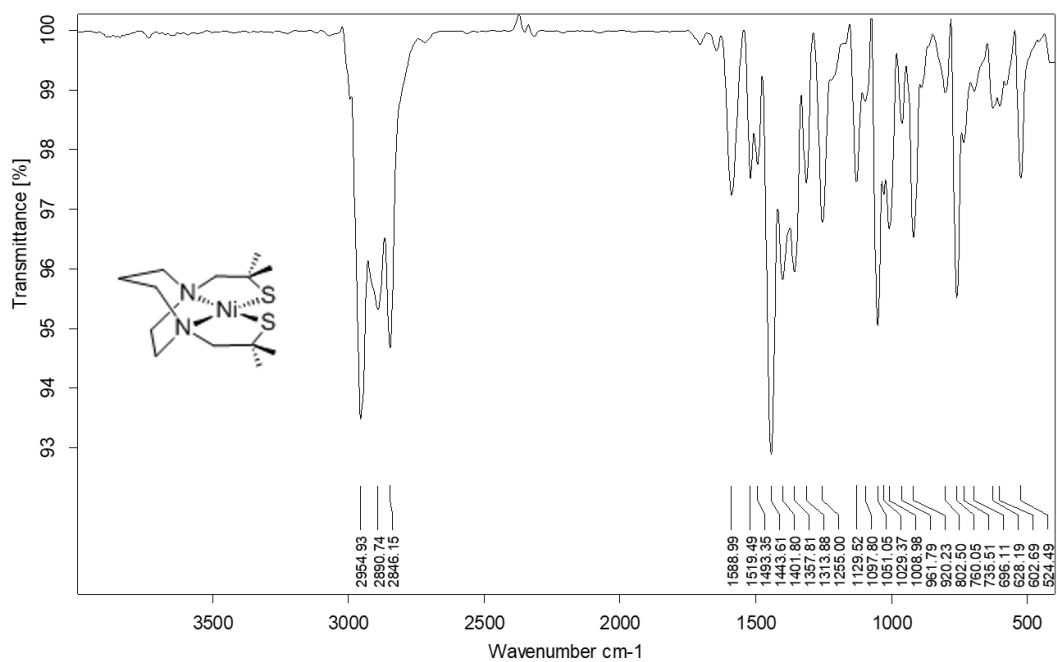

Fig. S1 IR spectrum of 1

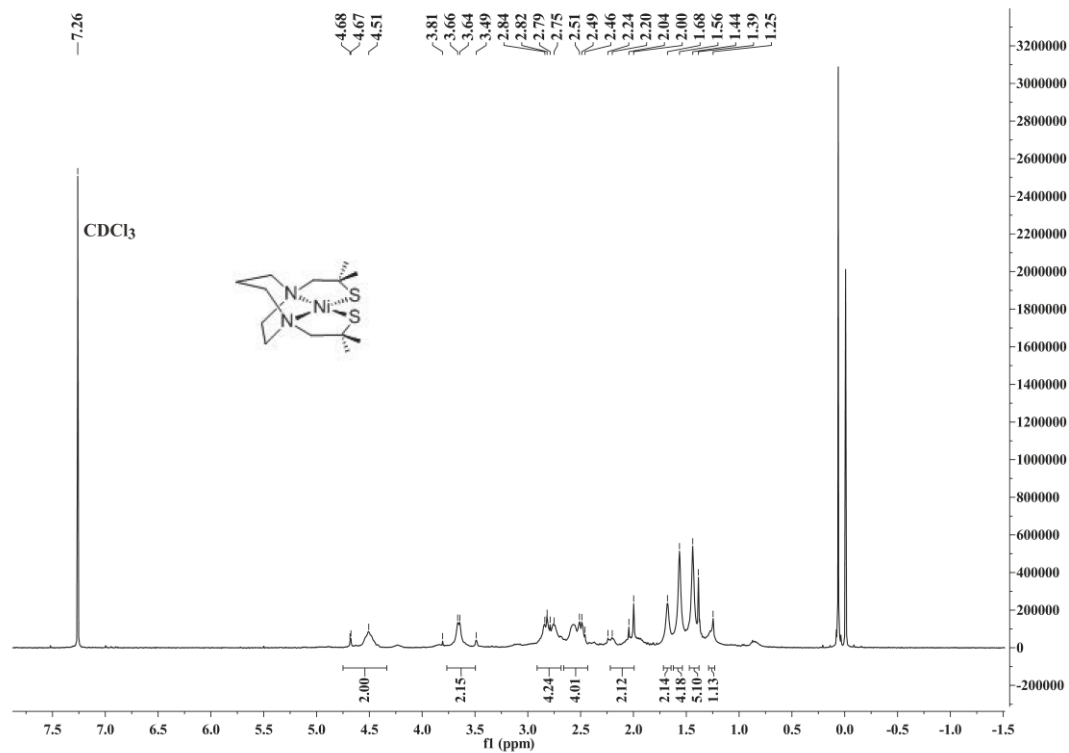

Fig. S2  $^1\text{H}$  NMR spectrum of 1

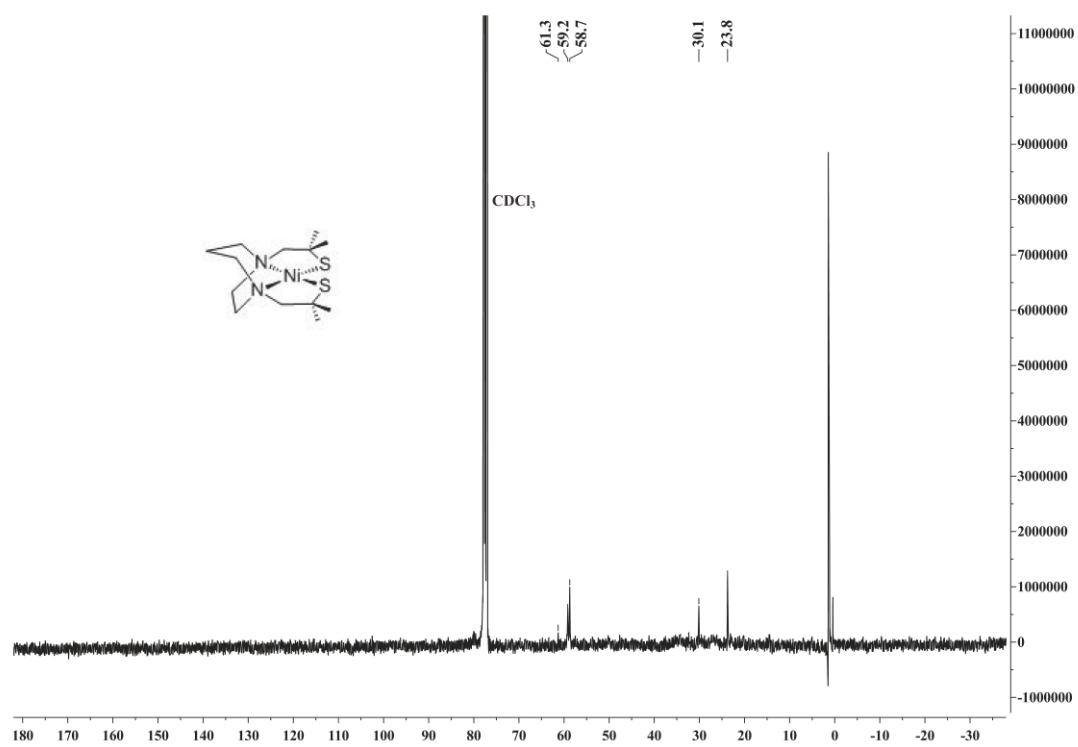

Fig. S3 <sup>13</sup>C NMR spectrum of 1

### 3. IR and $^1\text{H}$ ( $^{13}\text{C}$ ) NMR spectra of 2

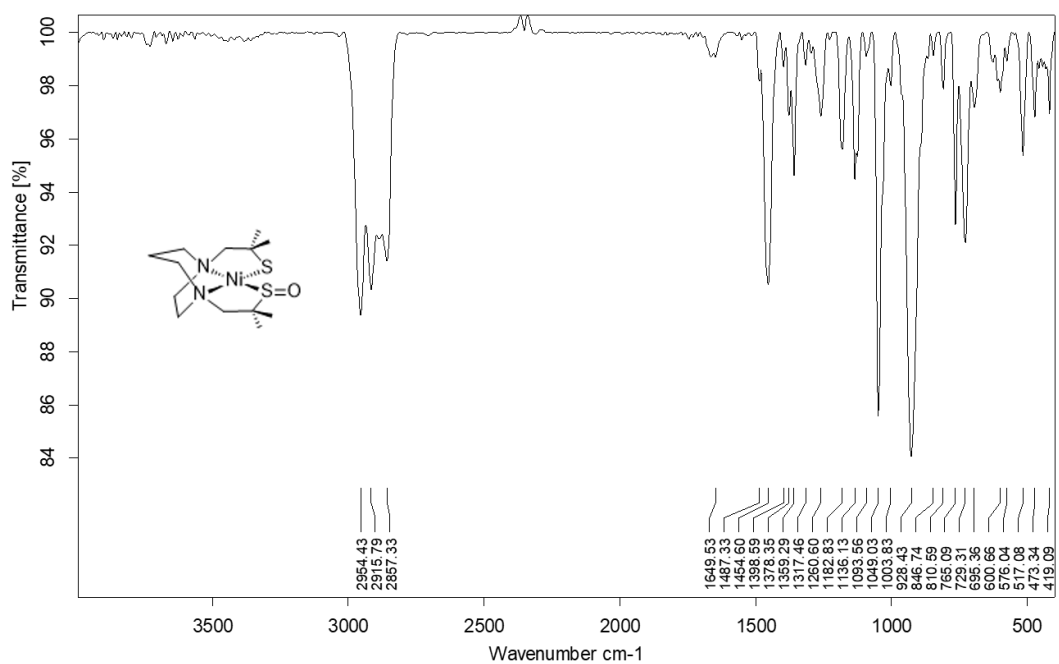

Fig. S4 IR spectrum of 2

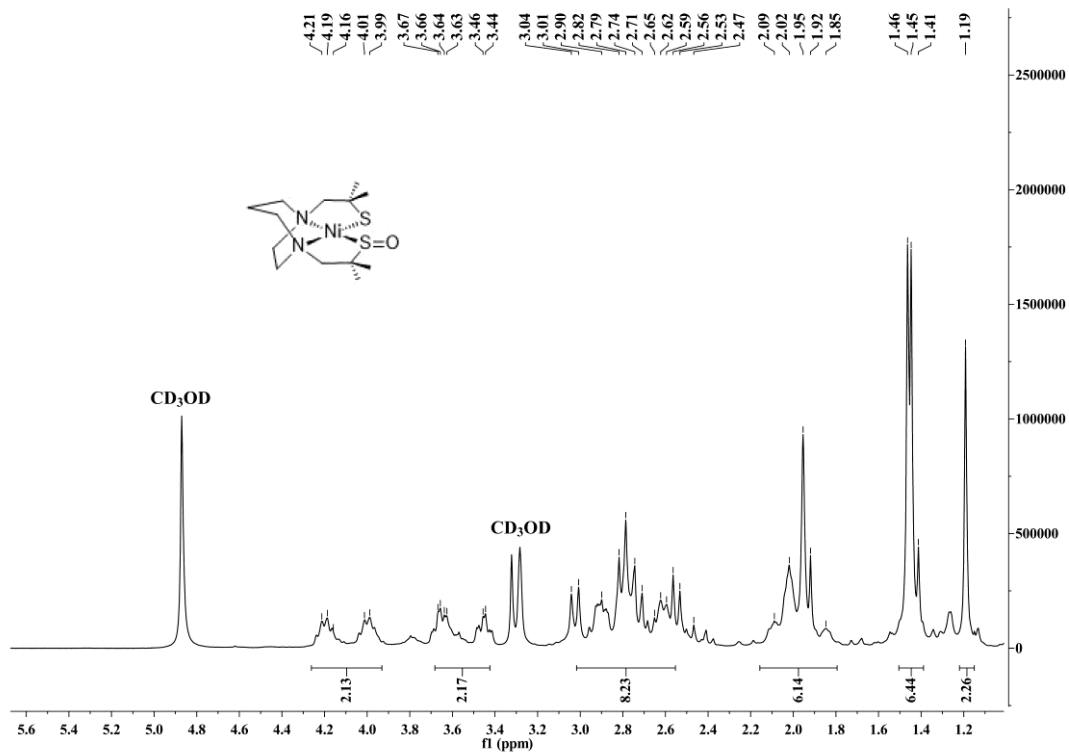

Fig. S5  $^1\text{H}$  NMR spectrum of 2

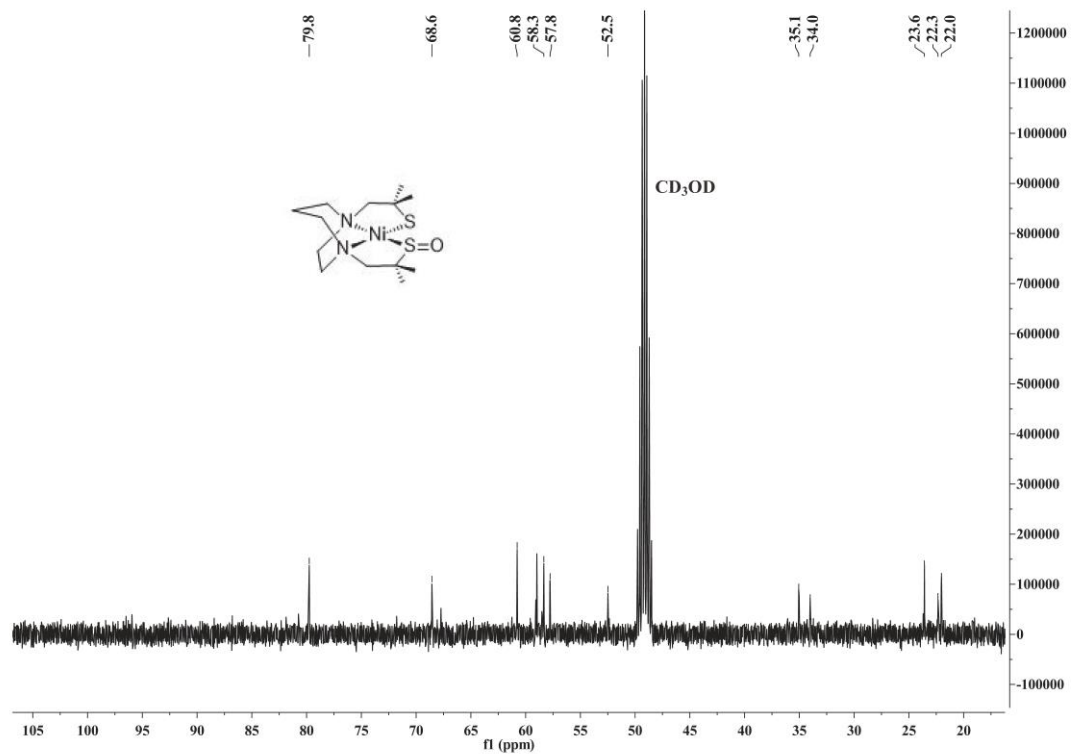

**Fig. S6**  $^{13}\text{C}$  NMR spectrum of **2**

#### 4. IR and $^1\text{H}$ ( $^{13}\text{C}$ ) NMR spectra of **3**

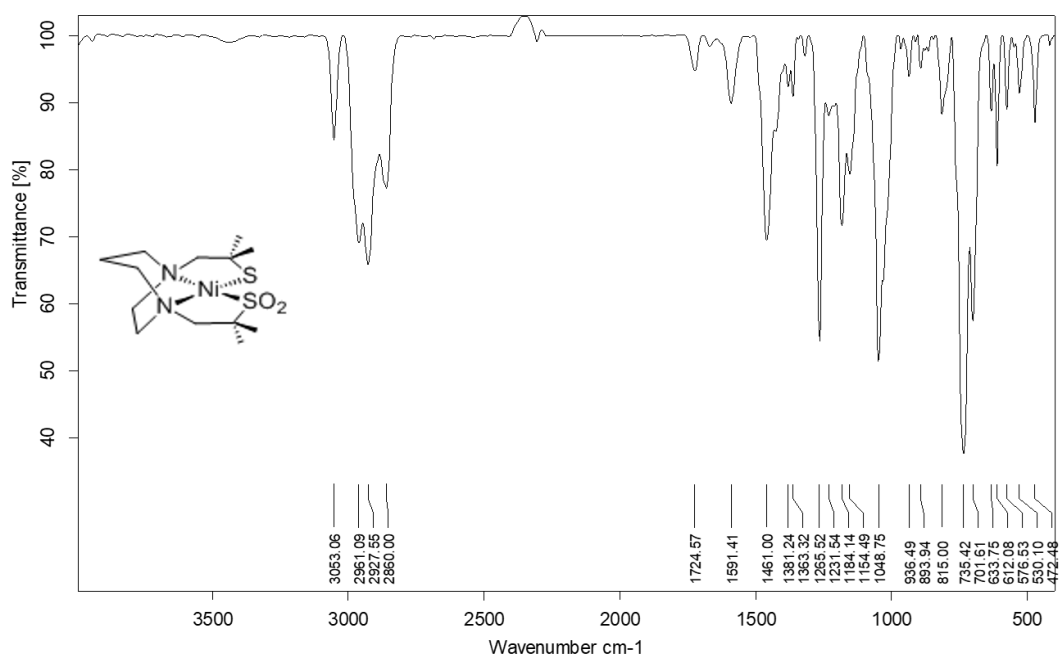

Fig. S7 IR spectrum of **3**

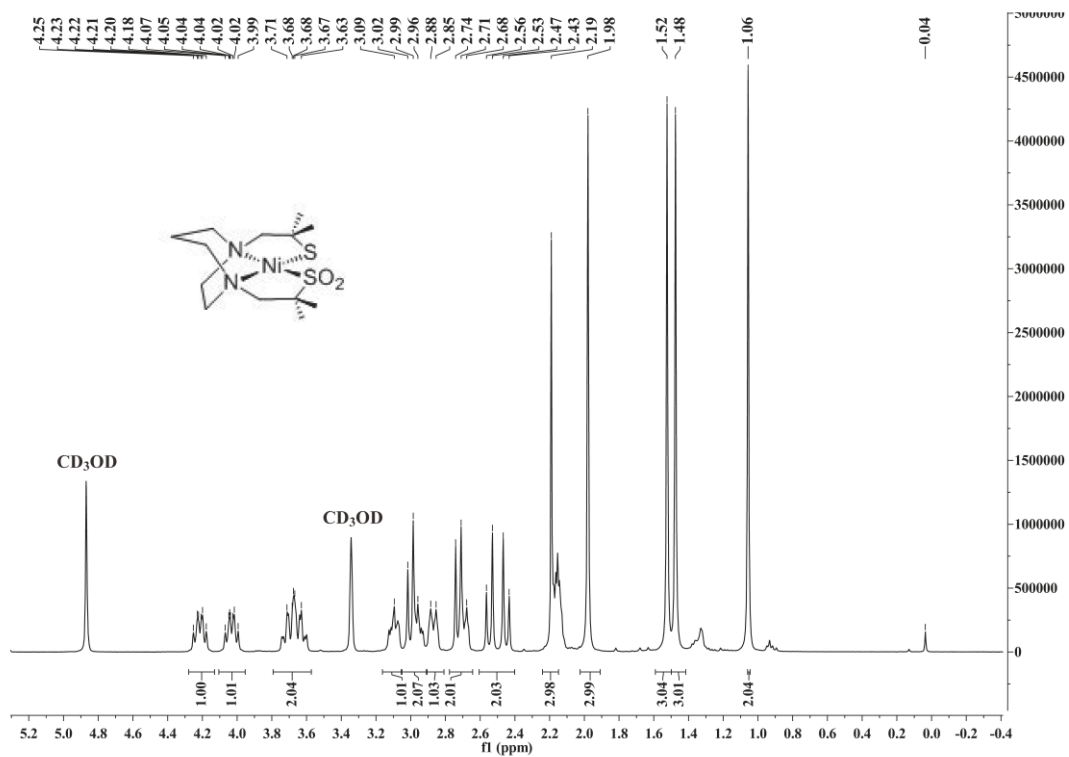

Fig. S8  $^1\text{H}$  NMR spectrum of **3**

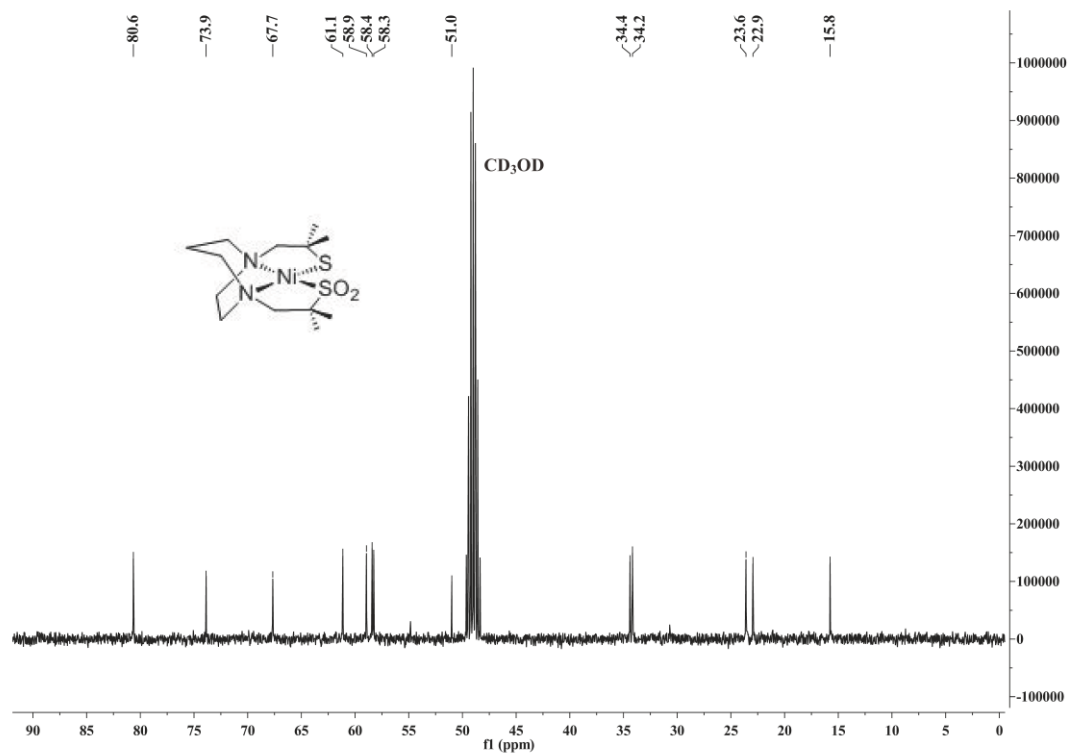

Fig. S9 <sup>13</sup>C NMR spectrum of 3



## 5. IR and $^1\text{H}$ ( $^{13}\text{C}$ ) NMR spectra of 4

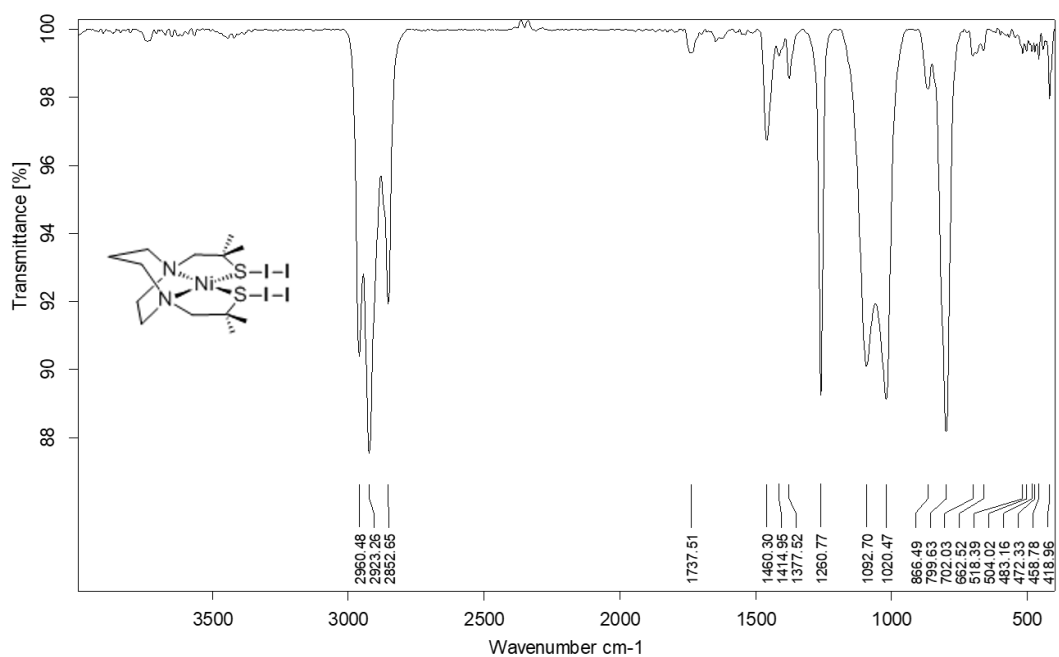

Fig. S10 IR spectrum of 4

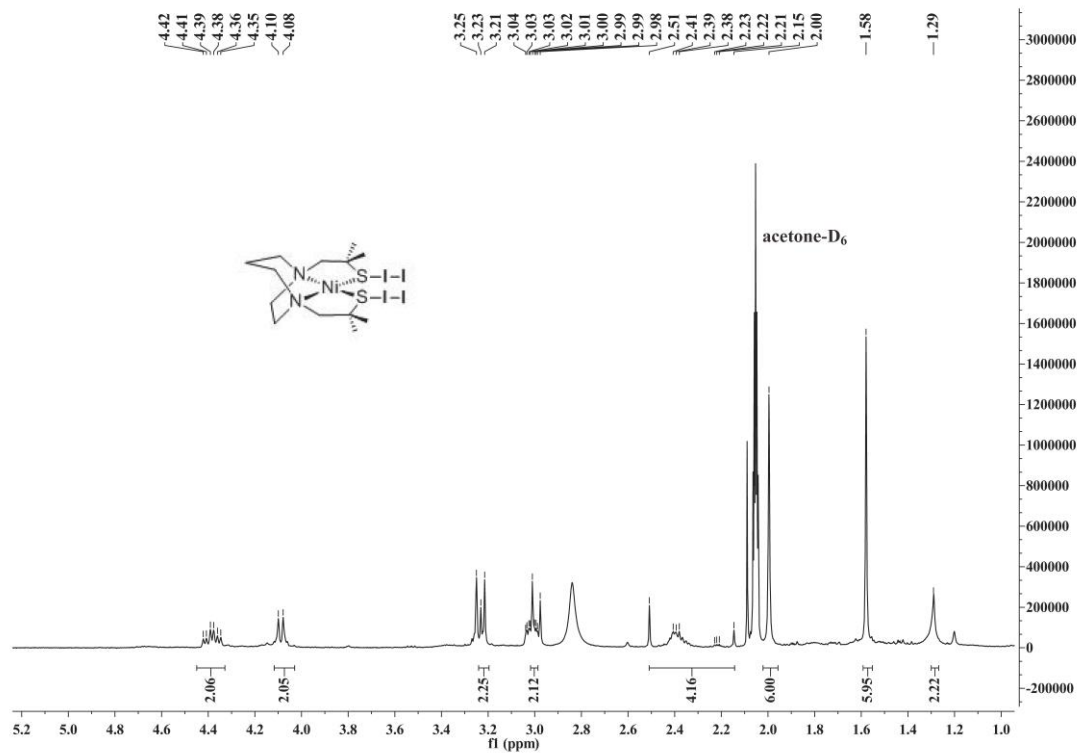

Fig. S11  $^1\text{H}$  NMR spectrum of 4

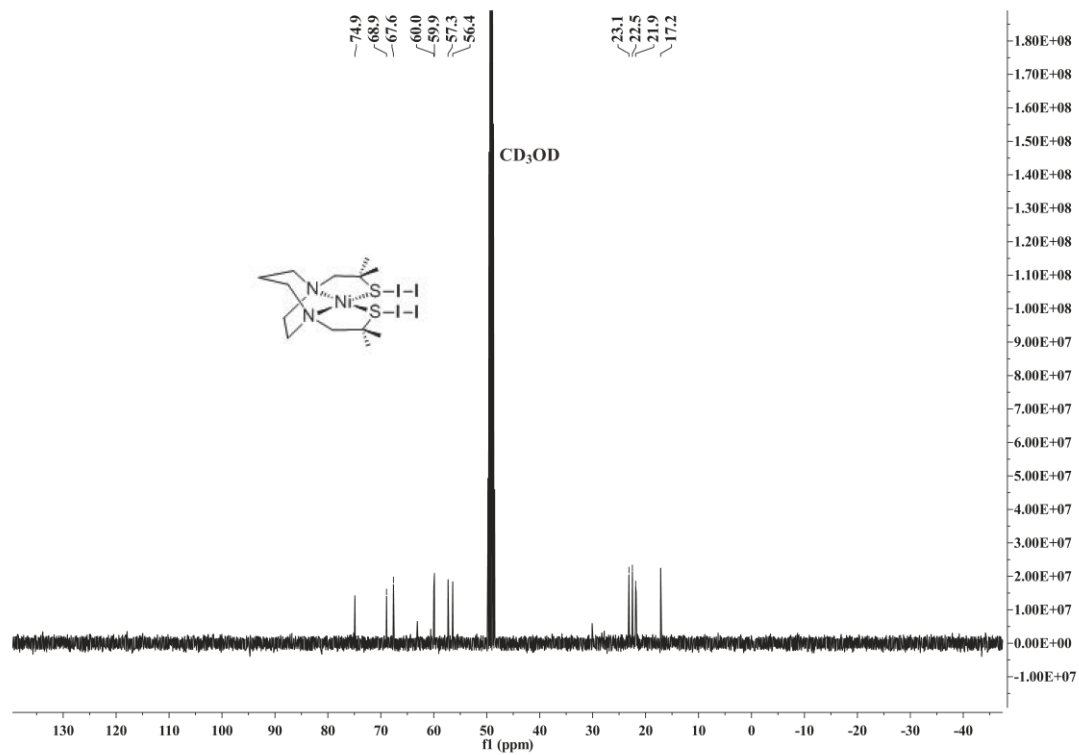

**Fig. S12**  $^{13}\text{C}$  NMR spectrum of **4**

## 6. IR and $^1\text{H}$ ( $^{13}\text{C}$ ) NMR spectra of **5**

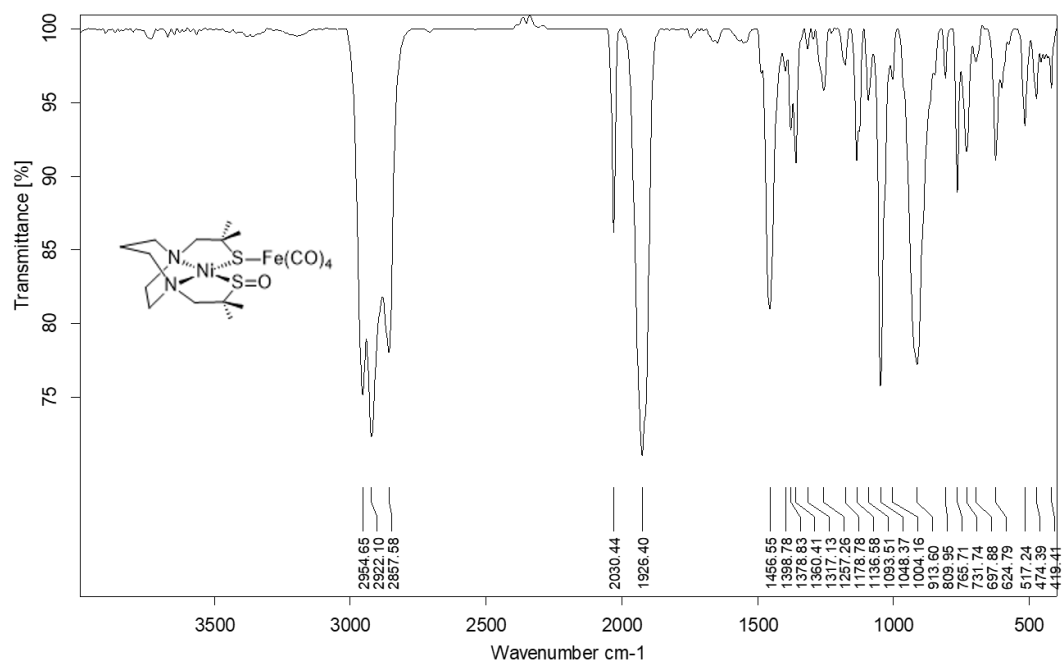

Fig. S13 IR spectrum of **5**

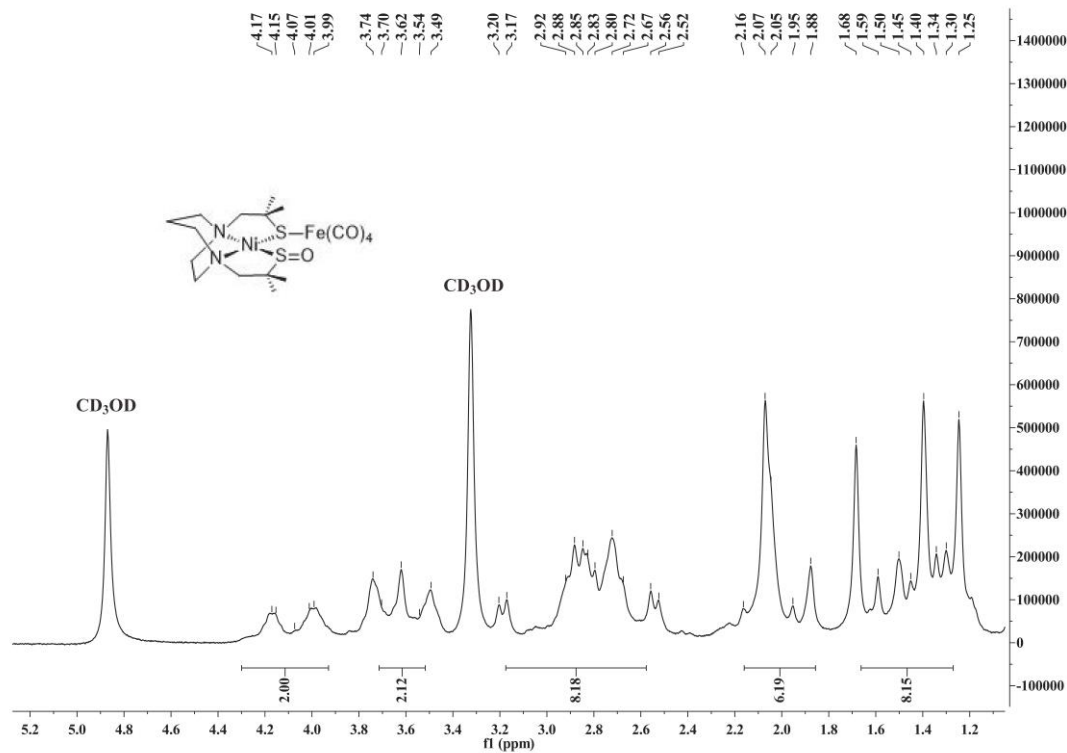

Fig. S14  $^1\text{H}$  NMR spectrum of **5**

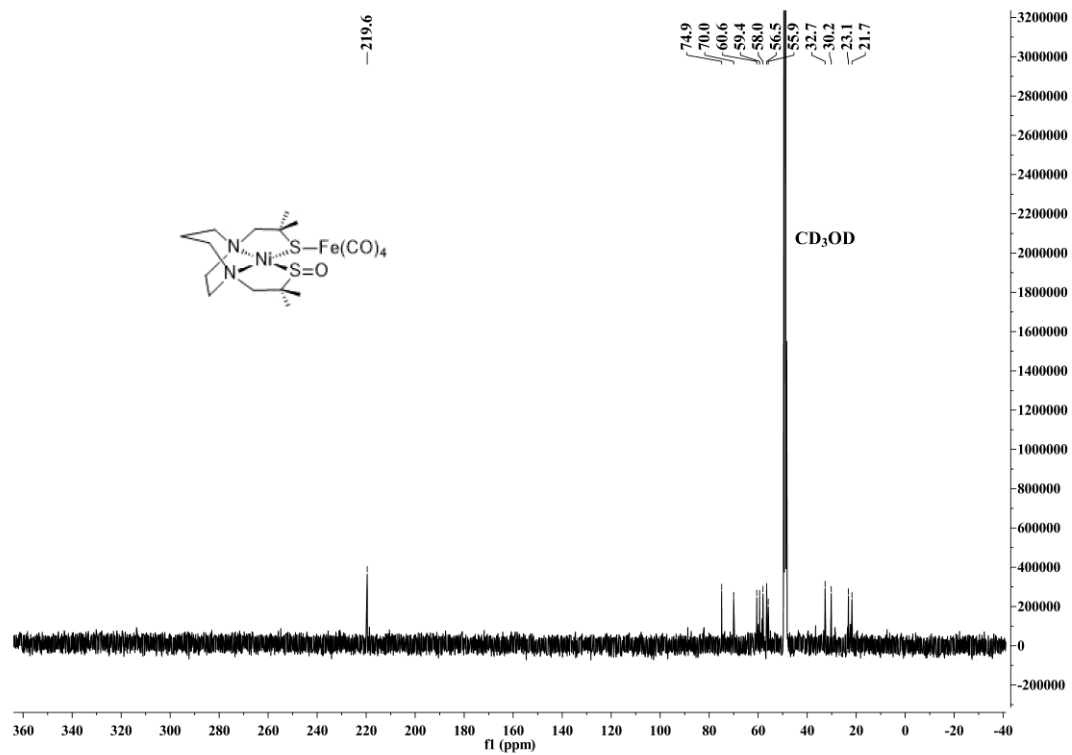

**Fig. S15** <sup>13</sup>C NMR spectrum of **5**

7. IR and  $^1\text{H}$ ( $^{13}\text{C}$ ) NMR spectra of 6

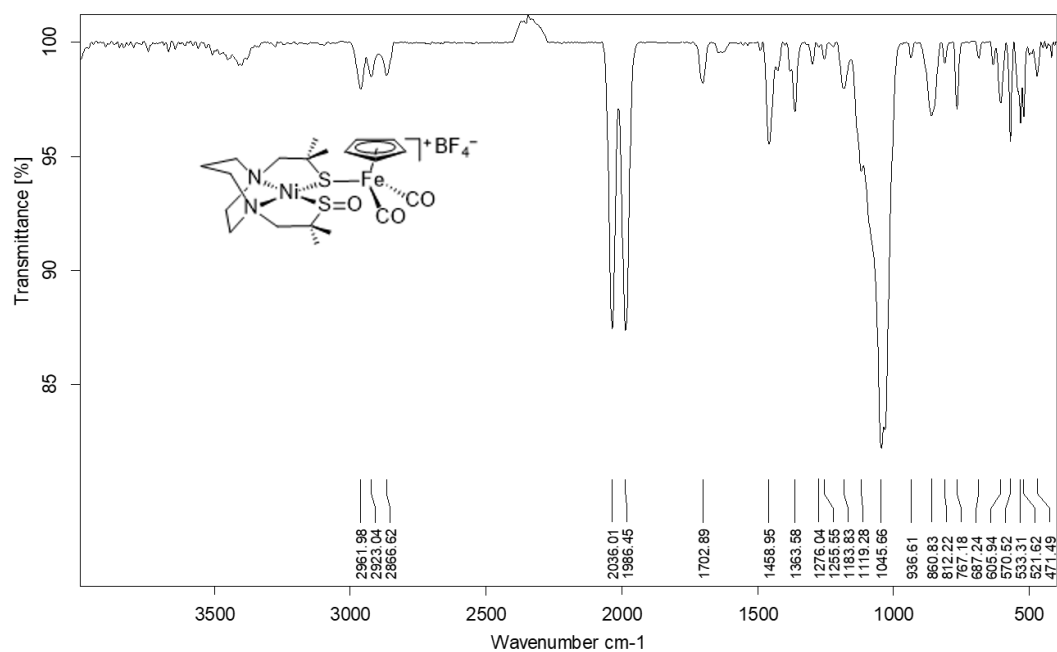

Fig. S16 IR spectrum of 6

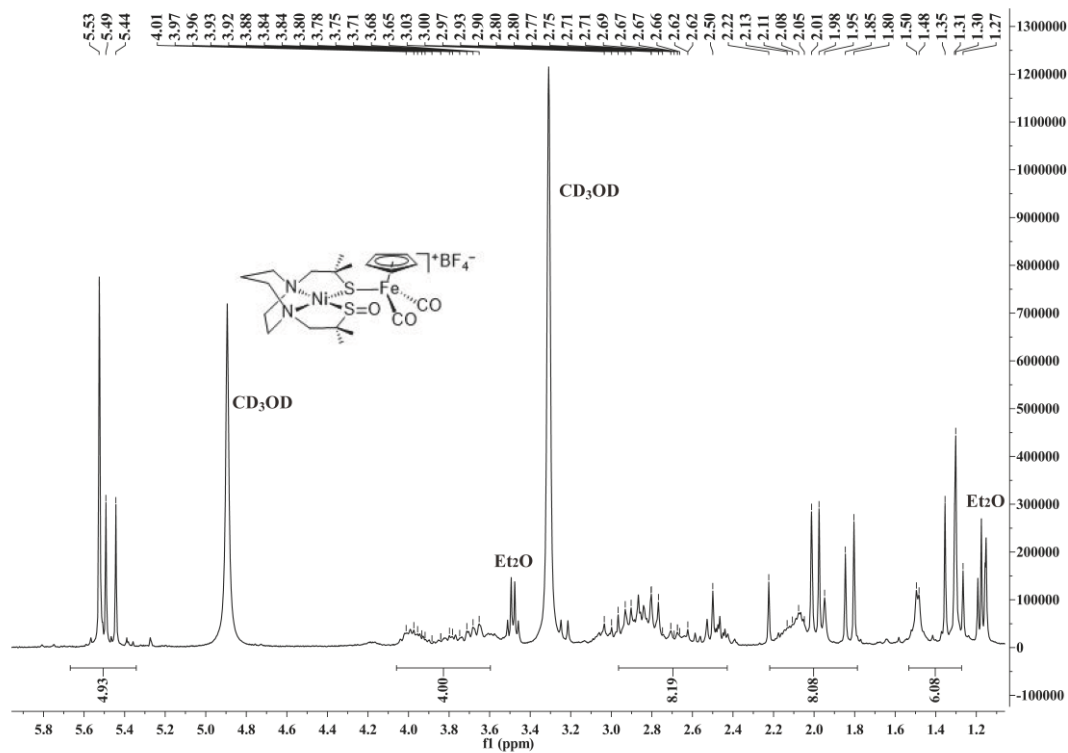

Fig. S17  $^1\text{H}$  NMR spectrum of 6

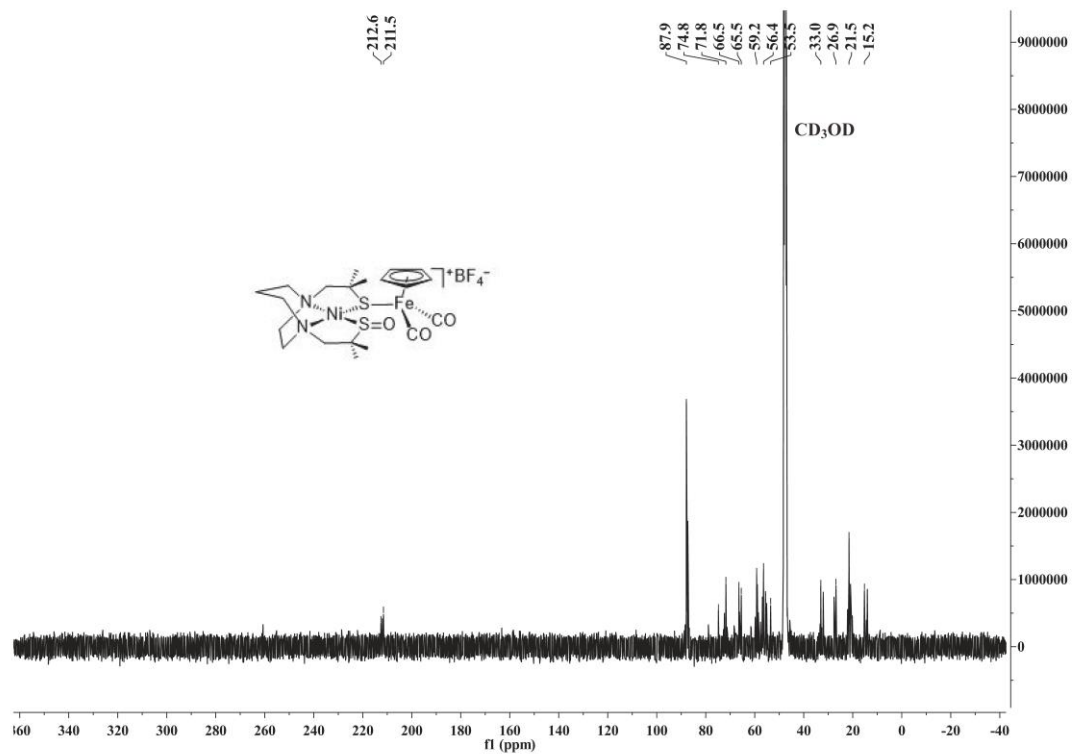

**Fig. S18**  $^{13}\text{C}$  NMR spectrum of **6**

### 8. IR and $^1\text{H}$ ( $^{13}\text{C}$ ) NMR spectra of 7

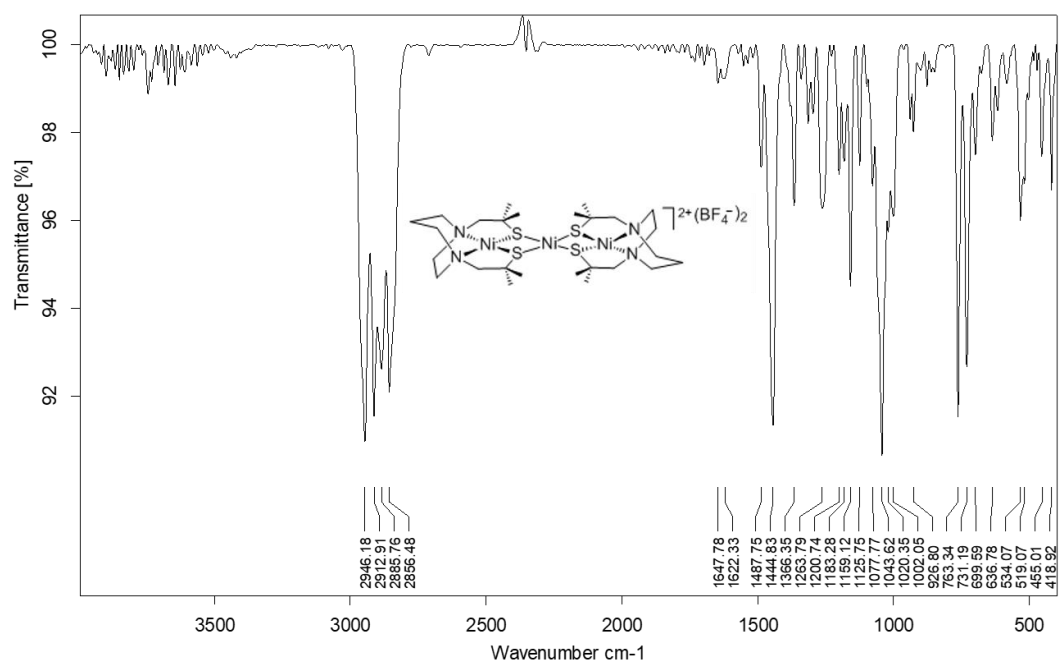

Fig. S19 IR spectrum of 7

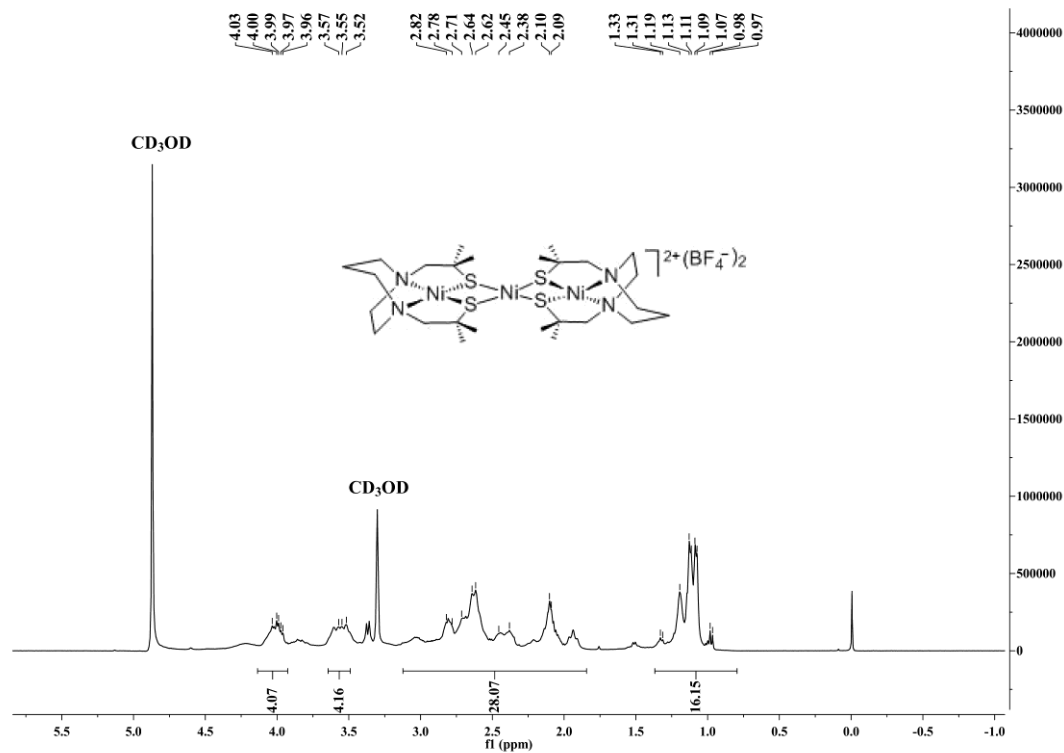

Fig. S20  $^1\text{H}$  NMR spectrum of 7

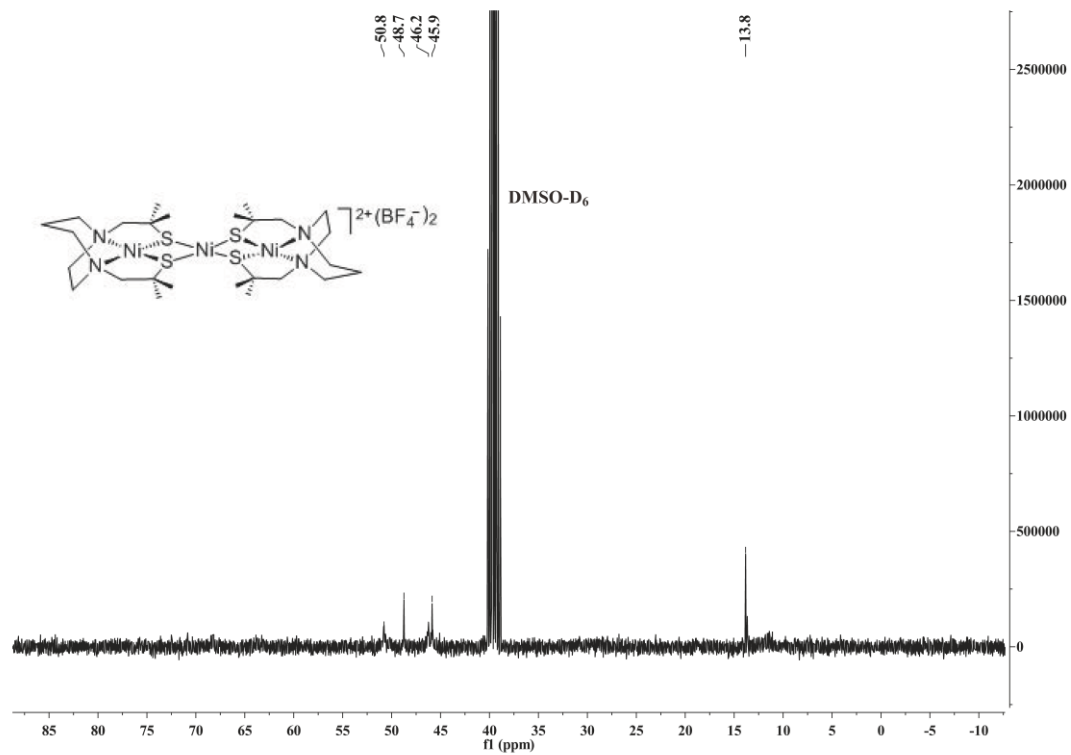

**Fig. S21**  $^{13}\text{C}$  NMR spectrum of **7**
